# Supplementary material for: One Hundred Years of Coat Colour Influences on Genetic Diversity in the Process of Development of a Composite Horse Breed
Source: MDPI journal article supplement (doi:10.3390/vetsci9020068), 2022-02-06
Supplement: s1 [file s1]

**Table S1.** Genetic background of coat colour phenotypes described in Spanish Purebred, Arabian Purebred and Hispano-Arabian horse breeds.

| Locus/Most Plausible Candidate Gene                                                                            | Chromosome | Nomenclature                                            | Alleles                                                   | Allelic combinations                                   | Effect of combined pairs of alleles |                                            |                                                             | Phenotype                                                                                                                                                                                                                                                                                                                                                                                                                                                                                                                                                                                                                                                                                                                | Gene ID   | Observations                                                                                                                                                                                                                                                 |
|----------------------------------------------------------------------------------------------------------------|------------|---------------------------------------------------------|-----------------------------------------------------------|--------------------------------------------------------|-------------------------------------|--------------------------------------------|-------------------------------------------------------------|--------------------------------------------------------------------------------------------------------------------------------------------------------------------------------------------------------------------------------------------------------------------------------------------------------------------------------------------------------------------------------------------------------------------------------------------------------------------------------------------------------------------------------------------------------------------------------------------------------------------------------------------------------------------------------------------------------------------------|-----------|--------------------------------------------------------------------------------------------------------------------------------------------------------------------------------------------------------------------------------------------------------------|
|                                                                                                                |            |                                                         |                                                           |                                                        | Skin                                | Hair                                       | Eyes                                                        |                                                                                                                                                                                                                                                                                                                                                                                                                                                                                                                                                                                                                                                                                                                          |           |                                                                                                                                                                                                                                                              |
| Melanocortin 1 receptor ( <i>MC1R</i> )                                                                        | 3          | Extension                                               | E <sup>e</sup> or e <sup>a</sup>                          | EE, Ee, or Ee <sup>a</sup>                             | Black                               | Black                                      | Dark                                                        | Black, seal brown, or bay                                                                                                                                                                                                                                                                                                                                                                                                                                                                                                                                                                                                                                                                                                | 1001      |                                                                                                                                                                                                                                                              |
|                                                                                                                |            |                                                         |                                                           | ee, ee <sup>a</sup> , or e <sup>a</sup> e <sup>a</sup> | Black                               | Red                                        | Dark                                                        | Chestnut/Sorrel                                                                                                                                                                                                                                                                                                                                                                                                                                                                                                                                                                                                                                                                                                          | 36907     |                                                                                                                                                                                                                                                              |
|                                                                                                                |            |                                                         |                                                           | aa                                                     | Black                               | Black in points/Red                        | Dark                                                        | Bay or Chestnut/Sorrel                                                                                                                                                                                                                                                                                                                                                                                                                                                                                                                                                                                                                                                                                                   | 10005433  |                                                                                                                                                                                                                                                              |
| Agouti-signaling protein ( <i>ASIP</i> )                                                                       | 22         | Agouti                                                  | A <sup>a</sup>                                            | AA or Aa                                               | Black                               | Black in points/Red                        | Dark                                                        | Black or Chestnut/Sorrel                                                                                                                                                                                                                                                                                                                                                                                                                                                                                                                                                                                                                                                                                                 | 5         |                                                                                                                                                                                                                                                              |
|                                                                                                                |            |                                                         |                                                           | aa                                                     | Pale                                | Red                                        | Blue                                                        | Cremello, perlino/pearl, or smoky cream (double dilute cream)                                                                                                                                                                                                                                                                                                                                                                                                                                                                                                                                                                                                                                                            | 10006824  |                                                                                                                                                                                                                                                              |
|                                                                                                                |            |                                                         |                                                           | C <sup>Cr</sup> /C <sup>Cr</sup>                       | Pale                                | Red                                        | Dark/Blue                                                   | Double Pearl, Isabelline/Isabella                                                                                                                                                                                                                                                                                                                                                                                                                                                                                                                                                                                                                                                                                        | 2         |                                                                                                                                                                                                                                                              |
| Solute Carrier Family 45 Member 2/Membrane-associated transporter protein ( <i>MATP/SLC45A2</i> )              | 21         | Cream/Pearl (also called "apricot" or "Barlink factor") | C <sup>Cr</sup> Pr <sup>l</sup> C, Pr <sup>l</sup> , or n | C <sup>Cr</sup> /C                                     | Dark/Pale which darkens with age    | Red                                        | Dark/Dark blue-gray                                         | Palomino, buckskin, or smoky black (single dilute cream)                                                                                                                                                                                                                                                                                                                                                                                                                                                                                                                                                                                                                                                                 |           | The dominant cream gene will activate the pearl phenotype if the two genes are present. The C <sup>Cr</sup> allele does not occur in Arabian horses. Therefore, there are no cream arab horses, and also no palomino, buckskin or smoky black horses either. |
|                                                                                                                |            |                                                         |                                                           | C <sup>Cr</sup> /C <sup>Pr<sup>l</sup></sup>           | Pale                                | Red                                        | Blue/Green                                                  | Pseudo-double dilute. Horses positive for both cream and pearl will exhibit a double-dilute phenotype, again with a highly pale coat color similar to that of horses that are homozygous for the cream gene. Known as cream pearl in the Purebred Spanish horse breed.                                                                                                                                                                                                                                                                                                                                                                                                                                                   |           |                                                                                                                                                                                                                                                              |
|                                                                                                                |            |                                                         |                                                           | C <sup>Cr</sup> /C <sup>Pr<sup>l</sup></sup>           | Pale                                | Red                                        | Blue/Green                                                  | No visual change to carrying horse, except for in the additional presence of the cream dilution gene (single dilute pearl)                                                                                                                                                                                                                                                                                                                                                                                                                                                                                                                                                                                               |           |                                                                                                                                                                                                                                                              |
|                                                                                                                |            |                                                         |                                                           | C/C <sup>Pr<sup>l</sup></sup>                          | Black or Pale                       | Black or Red                               | Dark or Pale                                                | Normal, undiluted.                                                                                                                                                                                                                                                                                                                                                                                                                                                                                                                                                                                                                                                                                                       |           |                                                                                                                                                                                                                                                              |
|                                                                                                                |            |                                                         |                                                           | C/C                                                    | Black                               | Black or Red                               | Dark                                                        | Pinkish-red, yellow-red, yellow or mouse grey, grullo (blue dun) with at least one primitive marking including dorsal stripe, shoulder stripe and leg barring.                                                                                                                                                                                                                                                                                                                                                                                                                                                                                                                                                           | 100056019 |                                                                                                                                                                                                                                                              |
|                                                                                                                |            |                                                         |                                                           | DD, D/ND1, or Dd                                       | Black                               | Red                                        | Dark                                                        | Horse is not diluted but has a darker dorsal stripe and may have other primitive markings                                                                                                                                                                                                                                                                                                                                                                                                                                                                                                                                                                                                                                |           |                                                                                                                                                                                                                                                              |
| T-box transcription factor ( <i>TBX3</i> )                                                                     | 8          | Dun/Wildtype                                            | DND1 ND2 or d                                             | ND1/ND1                                                | Black                               | Black or Red                               | Dark                                                        | Horse is not diluted, but has faint primitive markings.                                                                                                                                                                                                                                                                                                                                                                                                                                                                                                                                                                                                                                                                  |           |                                                                                                                                                                                                                                                              |
|                                                                                                                |            |                                                         |                                                           | ND1/d                                                  | Black                               | Black or Red                               | Dark                                                        | Undiluted with no primitive markings.                                                                                                                                                                                                                                                                                                                                                                                                                                                                                                                                                                                                                                                                                    |           |                                                                                                                                                                                                                                                              |
|                                                                                                                |            |                                                         |                                                           | dd                                                     | Black                               | Black or Red                               | Dark                                                        | Progressive silvering with age to white or flea-bitten, but is born a non-gray color. White to dark grey depending on age and the proportion of white hairs in the coat.                                                                                                                                                                                                                                                                                                                                                                                                                                                                                                                                                 | 100054797 |                                                                                                                                                                                                                                                              |
| Syntaxin 17 ( <i>STX17</i> )                                                                                   | 25         | Grey                                                    | Gg                                                        | GG or Gg                                               | Black                               | Black and/or Red and White                 | Dark                                                        | Does not gray with aging                                                                                                                                                                                                                                                                                                                                                                                                                                                                                                                                                                                                                                                                                                 |           |                                                                                                                                                                                                                                                              |
|                                                                                                                |            |                                                         |                                                           | gg                                                     | Black or Pale                       | Black and/or Red                           | Dark                                                        | Frame Overo pattern - Pinto horse pattern that forms a solid frame around white spotting. White is usually horizontal in orientation with jagged edges, color crosses the back and legs, face is often white.                                                                                                                                                                                                                                                                                                                                                                                                                                                                                                            | 100033875 |                                                                                                                                                                                                                                                              |
|                                                                                                                |            |                                                         |                                                           | Oo                                                     | Black and Pale                      | Black, Red and White                       | Dark or Blue                                                | No overo pattern present.                                                                                                                                                                                                                                                                                                                                                                                                                                                                                                                                                                                                                                                                                                |           |                                                                                                                                                                                                                                                              |
| Endothelin B receptor ( <i>EDNRB</i> )                                                                         | 17         | Frame Overo/Lethal white syndrome                       | O or Fr                                                   | oo                                                     | Black or Pale                       | Black or Red                               | Dark                                                        | Homozygous overo is lethal white syndrome, characterized by an incomplete colon and the inability to defecate, which leads to death or humane euthanization within 72 hours of birth.                                                                                                                                                                                                                                                                                                                                                                                                                                                                                                                                    |           | The Overo "O" allele is different from overo as a color pattern classification in those registries which also include the sabino genes under the heading "overo."                                                                                            |
|                                                                                                                |            |                                                         |                                                           | OO                                                     | Pale                                | White                                      | Blue                                                        | Tobiano, a form of pinto patterning. Produces regular and distinct ovals or rounded patterns of white and color with a somewhat vertical orientation. White extends across the back, down the legs, but face and tail are usually dark.                                                                                                                                                                                                                                                                                                                                                                                                                                                                                  | 100009704 |                                                                                                                                                                                                                                                              |
|                                                                                                                |            |                                                         |                                                           | TOTO or Tototo                                         | Black and pale-skinned patches      | Black, Red and White patches               | Usually Dark, but one or both may be Blue or partially Blue | No tobiano pattern present.                                                                                                                                                                                                                                                                                                                                                                                                                                                                                                                                                                                                                                                                                              |           |                                                                                                                                                                                                                                                              |
| Inversion starting about 100k bp downstream of proto-oncogene, c-KIT receptor tyrosine kinase ( <i>c-KIT</i> ) | 3          | Tobiano                                                 | TOto                                                      | toto                                                   | Black or Pale                       | Black or Red                               | Dark                                                        | Thought to be lethal. Embryo reabsorbed or fetus dies <i>in utero</i> .                                                                                                                                                                                                                                                                                                                                                                                                                                                                                                                                                                                                                                                  | 100009704 | Complex. Sabino is registered as overo by some registries, but is not frame overo and does not cause overo lethal white syndrome.                                                                                                                            |
|                                                                                                                |            |                                                         |                                                           | W/W                                                    | Pale                                | Entirely or almost entirely white          | Blue                                                        | Hair coat is white from birth. There may be some patches of color, which may fade to white as the horse grows older.                                                                                                                                                                                                                                                                                                                                                                                                                                                                                                                                                                                                     |           |                                                                                                                                                                                                                                                              |
|                                                                                                                |            |                                                         |                                                           | W/n, W5/W20, W20/W22, or SB1/SB1 (Maximum Sabino)      | Pink                                | White                                      | Dark                                                        | Assorted pinto or roan-like markings. abundant white on the legs, belly spots or body spots that can be flecked or roaned, chin spots, or white on the face extending past the eyes.                                                                                                                                                                                                                                                                                                                                                                                                                                                                                                                                     |           |                                                                                                                                                                                                                                                              |
| <i>c-KIT</i> or <i>CD117</i> (cluster of differentiation 117)                                                  | 3          | White, Sabino                                           | SB1/n (Classic sabino)                                    | SB1/n                                                  | Pink                                | White                                      | Dark or Blue (But not linked to SB1)                        | Horse is fully pigmented.                                                                                                                                                                                                                                                                                                                                                                                                                                                                                                                                                                                                                                                                                                |           |                                                                                                                                                                                                                                                              |
|                                                                                                                |            |                                                         |                                                           | n/n                                                    | Black or Pale                       | Black and/or Red                           | Dark                                                        | Even mixture of interspersed white and colored hairs in the coat which are more scattered or absent on the head, mane, tail, and lower legs. The unaffected color on the legs often forms a sharp, inverted "V" above the knee and hock, not seen in other roan-like coat patterns. The non-white underlying coat may be any color, as determined by unrelated genetic factors. Black roans are referred to as blue roans, bay roans as red roans, and chestnut roans as strawberry roans, but there are also references to purple roans, lilac roans, and honey roans. Further, a "red roan" could have either bay or chestnut as the underlying color, while some dark bay roans were called blue roan or purple roan. | 100009704 |                                                                                                                                                                                                                                                              |
|                                                                                                                |            |                                                         |                                                           | RnRn or RnRn                                           | Black or Pale                       | Black or Red with interspersed White hairs | Dark                                                        | No roan pattern.                                                                                                                                                                                                                                                                                                                                                                                                                                                                                                                                                                                                                                                                                                         |           |                                                                                                                                                                                                                                                              |
| Near or at <i>c-KIT</i>                                                                                        | 3          | Roan                                                    | RnRn                                                      | RnRn                                                   | Black                               | Black                                      | Dark                                                        | The first record for this pattern dates back to                                                                                                                                                                                                                                                                                                                                                                                                                                                                                                                                                                                                                                                                          |           | Gene not present in Arabians, although coat officially appears in registries. Roan in Arabians is probably associated with perhaps sabino. Unlike with the traditional Roan gene, in Arabians a roan offspring can be produced by non-roan parents.          |
|                                                                                                                |            |                                                         |                                                           | mrn                                                    | Black                               | Black                                      | Dark                                                        |                                                                                                                                                                                                                                                                                                                                                                                                                                                                                                                                                                                                                                                                                                                          |           |                                                                                                                                                                                                                                                              |
|                                                                                                                |            |                                                         |                                                           | SW1/SW3n                                               | Black and Pale under White markings | Black or Red with White markings           | Dark/Blue                                                   | Classic splashed white.                                                                                                                                                                                                                                                                                                                                                                                                                                                                                                                                                                                                                                                                                                  |           |                                                                                                                                                                                                                                                              |

|                                      |   |  |                 |         |                                     |                                  |           |                                                             |                   |                                                                                                                                                                                                                                                                                                                                                                        |
|--------------------------------------|---|--|-----------------|---------|-------------------------------------|----------------------------------|-----------|-------------------------------------------------------------|-------------------|------------------------------------------------------------------------------------------------------------------------------------------------------------------------------------------------------------------------------------------------------------------------------------------------------------------------------------------------------------------------|
| transcription factor ( <i>MITF</i> ) |   |  |                 | SW1/n   | Black and Pale under White markings | Black or Red with White markings | Dark/Blue | White markings on head and legs.                            | 1000<br>3391<br>8 | 2006, when Splashed White mutation occurred spontaneously in a PRE bay filly with a white bonnet, blue eyes, and white stockings was born to two solid bay parents. DNA parentage testing confirmed that the filly was truly the daughter of her proposed parents and she was registered as Unica LXXX and reproated to have a bay coat (her solid colour underneath). |
|                                      |   |  |                 | SW3/SW3 | Letal                               | Letal                            | Letal     | May be embryonic lethal                                     |                   |                                                                                                                                                                                                                                                                                                                                                                        |
|                                      |   |  |                 | SW3/n   | Black and Pale under White markings | Black or Red with White markings | Dark/Blue | Splashed white.                                             |                   |                                                                                                                                                                                                                                                                                                                                                                        |
|                                      |   |  |                 | n/n     | Black and Pale                      | Black or Red                     | Dark      | No splashed White.                                          |                   |                                                                                                                                                                                                                                                                                                                                                                        |
| Paired box gene 3 ( <i>PAX3</i> )    | 6 |  | SW2<br>SW4<br>n | SW2/SW2 | Black and Pale under White markings | Black or Red with White markings | Dark/Blue | Classic splashed white.                                     | 1000<br>5651<br>7 |                                                                                                                                                                                                                                                                                                                                                                        |
|                                      |   |  |                 | SW2/n   | Black and Pale under White markings | Black or Red with White markings | Dark/Blue | Splashed white, but usually not as loud as a classic splash |                   |                                                                                                                                                                                                                                                                                                                                                                        |
|                                      |   |  |                 | SW4/SW4 | Letal                               | Letal                            | Letal     | Might be lethal.                                            |                   |                                                                                                                                                                                                                                                                                                                                                                        |
|                                      |   |  |                 | SW4/n   | Black and Pale under White markings | Black or Red with White markings | Dark/Blue | Splashed white or broad blaze.                              |                   |                                                                                                                                                                                                                                                                                                                                                                        |
|                                      |   |  |                 | n/n     | Black and Pale                      | Black or Red                     | Dark      | No splashed White.                                          |                   |                                                                                                                                                                                                                                                                                                                                                                        |

Accessed from Sponenberg and Bellone (2017)
