# Supplementary material for: One Hundred Years of Coat Colour Influences on Genetic Diversity in the Process of Development of a Composite Horse Breed
Source: Vet Sci. 2022 Feb 6;9(2):68. doi: 10.3390/vetsci9020068 (PMC8879117; doi:10.3390/vetsci9020068)
Supplement: Supplementary file 1 [file vetsci-09-00068-s001.zip › Table S2.pdf]

**Table S2.** Summary of the results derived from offspring analyses and stallion/ratios across coat colour subgroups in historic and current population sets.

| Population Set<br>Parameter                     | Population set | Grey       | Bay         | Chestnut/So<br>rel | Black       | Overo       | Roan        | Dun         | White     | Isabelline  | Cremello   | Pearl     | Palomino  | Smoky<br>Cream |
|-------------------------------------------------|----------------|------------|-------------|--------------------|-------------|-------------|-------------|-------------|-----------|-------------|------------|-----------|-----------|----------------|
| Stallions %                                     | Historical     | 47.81      | 47.82       | 46.17              | 48.27       | 47.50       | 47.39       | 45.14       | 49.30     | 25.74       | 20.59      | 41.07     | 50.00     | 100.00         |
|                                                 | Current        | 48.40      | 48.57       | 47.40              | 49.24       | 48.57       | 46.95       | 46.28       | 61.54     | 25.27       | 21.21      | 41.82     | 50.00     | 100.00         |
| Mean number of foals per stallion, n            | Historical     | 4.97±26.62 | 13.98±22.40 | 9.44±17.52         | 15.59±23.00 | 14.89±15.42 | 12.64±22.49 | 19.97±29.32 | 2.80±3.49 | 10.56±17.90 | 11.00±0.00 | N/A       | N/A       | N/A            |
|                                                 | Current        | 9.39±14.25 | 13.34±21.01 | 7.87±14.46         | 15.30±22.99 | 4.33±5.77   | 10.83±19.27 | 19.05±28.61 | 2.80±3.49 | 13.29±19.70 | 11.00±0.00 | N/A       | N/A       | N/A            |
| Maximum foal number per stallion, n             | Historical     | 1804±26.62 | 366±22.40   | 219±17.52          | 272±23.00   | 40±15.42    | 65±22.49    | 128±29.32   | 9±3.49    | 57±17.90    | 11.00±0.00 | N/A       | N/A       | N/A            |
|                                                 | Current        | 236±14.25  | 366±21.01   | 219±14.46          | 272±22.99   | 11±5.77     | 50±19.27    | 128±28.61   | 9±3.49    | 57±19.70    | 11.00±0.00 | N/A       | N/A       | N/A            |
| Mares %                                         | Historical     | 52.19      | 52.18       | 53.83              | 51.73       | 52.50       | 52.61       | 54.86       | 50.70     | 74.26       | 79.41      | 58.93     | 50.00     | 0.00           |
|                                                 | Current        | 51.6       | 51.43       | 52.60              | 50.76       | 51.43       | 53.05       | 53.72       | 38.46     | 74.73       | 78.79      | 58.18     | 50.00     | 0.00           |
| Mean number of foals per mare, n                | Historical     | 4.30±3.42  | 4.00±3.27   | 3.53±3.05          | 2.91±2.57   | 2.75±1.92   | 3.23±3.42   | 2.74±2.14   | 2.23±1.48 | 2.56±2.14   | 1.50±0.54  | 1.20±0.45 | 2.00±0.00 | N/A            |
|                                                 | Current        | 3.70±2.75  | 3.57±2.71   | 2.97±2.44          | 2.62±2.05   | 2.50±2.07   | 1.54±0.97   | 2.47±1.75   | 3.00±2.65 | 2.02±1.41   | 1.57±0.54  | 1.20±0.45 | 2.00±0.00 | N/A            |
| Maximum foal number per mare, n                 | Historical     | 24.00±3.42 | 21.00±3.27  | 19.00±3.05         | 18.00±2.57  | 8.00±1.92   | 11.00±3.42  | 11.00±2.14  | 6.00±1.48 | 10.00±2.14  | 2.00±0.54  | 2.00±0.45 | 2.00±0.00 | N/A            |
|                                                 | Current        | 18.00±2.75 | 16.00±2.71  | 17.00±2.44         | 14.00±2.05  | 6.00±2.07   | 4.00±0.97   | 7.00±1.75   | 6.00±2.65 | 7.00±1.41   | 2.00±0.45  | 2.00±0.00 | 1.00±0.00 | N/A            |
| Stallion/Mare Ratio                             | Historical     | 0.92/1     | 0.92/1      | 0.86/1             | 0.93/1      | 0.90/1      | 0.90/1      | 0.82/1      | 0.97/1    | 0.35/1      | 0.26/1     | 0.70/1    | 1/1       | 0              |
|                                                 | Current        | 0.94/1     | 0.94/1      | 0.90/1             | 0.97/1      | 0.94/1      | 0.89/1      | 0.86/1      | 1.60/1    | 0.34/1      | 0.27/1     | 0.72/1    | 1/1       | 0              |
| Progeny from stallions selected for breeding, % | Historical     | 15.32      | 17.14       | 21.78              | 17.60       | 25.64       | 9.09        | 12.62       | 16.67     | 18.87       | 0          | 17.65     | 0         | 0              |
|                                                 | Current        | 11.07      | 41.59       | 18.12              | 16.53       | 22.22       | 6.93        | 12.67       | 0         | 17.02       | 0          | 8.33      | 0         | 50.00          |
| Progeny from mares selected for breeding, %     | Historical     | 48.14      | 41.59       | 43.28              | 29.36       | 48.84       | 17.42       | 18.96       | 37.84     | 35.10       | 32.14      | 25.00     | 22.22     | 0              |
|                                                 | Current        | 43.97      | 38.30       | 35.89              | 27.06       | 36.84       | 12.28       | 15.52       | 25.00     | 33.58       | 29.63      | 18.18     | 22.22     | 0              |

N/A: No offspring was registered.
